# Supplementary material for: Nanobead handling on a centrifugal microfluidic LabDisk for automated extraction of cell-free circulating DNA with high recovery rates
Source: Royal Society of Chemistry journal article supplement (doi:10.1039/d2an01820a), 2023-01-01
Supplement: d2an01820a1.pdf [file d2an01820a1.pdf]

# Electronic Supplementary Information (ESI)

## Nanobead handling on a centrifugal microfluidic LabDisk for automated extraction of cell-free circulating DNA with high recovery rates

Franziska Schlenker<sup>a</sup>, Peter Juelg<sup>a,b</sup>, Jan Lüddecke<sup>a,b</sup>, Nils Paust<sup>a,b</sup>, Roland Zengerle<sup>a,b</sup>, and  
Tobias Hutzenlaub<sup>\*,a,b</sup>

<sup>a</sup> Hahn-Schickard, Georges-Koehler-Allee 103, 79110 Freiburg, Germany

<sup>b</sup> Laboratory for MEMS Applications, IMTEK - Department of Microsystems Engineering,  
University of Freiburg, Georges-Koehler-Allee 103, 79110 Freiburg, Germany

### Corresponding author:

Name: Tobias Hutzenlaub

Hahn-Schickard, Georges-Koehler-Allee 103, 79110 Freiburg, Germany

E-mail: tobias.hutzenlaub@hahn-schickard.de

Phone: +49 761 203 73269

Fax: +49 761 203 73299

*ESI: Nanobead handling on a centrifugal microfluidic LabDisk for automated extraction of cell-free circulating DNA with high recovery rates*

**Table S1** Sequences of the primers, mediator probes and universal reporters for the 2-plex mediator probe ddPCR and qPCR assay.

| <b>Name</b>               | <b>Sequence 5'-3'</b>                               | <b>5' mod</b> | <b>3' mod</b> | <b>Internal</b> |
|---------------------------|-----------------------------------------------------|---------------|---------------|-----------------|
| <b>Fwd_Primer_KRAS</b>    | GGCCTGCTGAAAATGACT                                  | -             | -             | -               |
| <b>Rev_Primer_KRAS</b>    | ACAAAATGATTCTGAATTAGCTGTA                           | -             | -             | -               |
| <b>MP_UR05_G12D</b>       | ATGTCCCAGGTGCATGGCGTAGGCAAGAGTGCCTTGACGAT           | -             | MP Block      | -               |
| <b>MP_UR02_WT</b>         | CTCCAGTTCGGTCCAGCTCCAACCTACCACAAGTTTATATTCAG        | -             | MP Block      | -               |
| <b>BRAF Fwd. Primer</b>   | GACCCACTCCATCGAGATTTTC                              | -             | -             | -               |
| <b>BRAF Rev. Primer</b>   | GCTTGCTCTGATAGGAAAATGAG                             | -             | -             | -               |
| <b>MP BRAF WT_UR06</b>    | GGTAGGCTCACTGACTGTAGCTAGACCAAAATCACCTATTTTTACTGTGAG | -             | MP Block      | -               |
| <b>MP BRAF V600E_UR05</b> | GGTAGGCTCACTGACTGTAGCTAGACCAAAATCACCTATTTTTACTGTGAG | -             | MP Block      | -               |
| <b>UR05_red</b>           | GACCGGCTAAGACGCGCCGGT7TGT7GCACCTGGGACATCGACTAT      | BHQ-2         | UR Block      | 7=dC-Atto 647N  |
| <b>UR02_green</b>         | ATTGCGGGAGATGAGACCCGCAA8TGTTCACTGACCGAACTGGAGCA     | BMN-Q535      | UR Block      | 8=dT-FAM        |
| <b>UR06_green</b>         | ATTGCGGGAGATGAGACCCGCAA8TGTTCACTGAGCCTACCTGCCTTC    | BMN-Q-535     | UR Block      | 8=dTFAM         |

*ESI: Nanobead handling on a centrifugal microfluidic LabDisk for automated extraction of cell-free circulating DNA with high recovery rates*

### **Instruction for gBlock® resuspension (IDT manual)**

The preparation of the synthetic gBlock® DNA follows the manufacturer's instruction.

- 1) Centrifugation at 3000 g
- 2) Add TE buffer to a final stock concentration of 10 ng/μl DNA
- 3) Vortex briefly
- 4) Tube incubation at 50°C for 20 min.
- 5) Vortex briefly and centrifuge

### **Instruction for HaeIII digestion (NEB manual)**

The digestion of the human genomic DNA from Roche with HaeIII from NEB follows the manufacturer's instruction.

For 5 μg DNA:

- 1) 15 μl water
- 2) Add 5 μl NEB buffer (10 x)
- 3) Add 25 μl human genomic DNA (0.2 μg/μl) for a final amount of 5 μg DNA with a final concentration of 100 ng/μl
- 4) Add 5 μl enzyme HaeIII (concentration: 10 U/μl)
- 5) Pipet up and down (do not vortex)
- 6) Incubation for 1 h @ 37°C
- 7) Heat inactivation for 20 min @ 65°C

*ESI: Nanobead handling on a centrifugal microfluidic LabDisk for automated extraction of cell-free circulating DNA with high recovery rates*

**Table S2** Extraction protocol for cfDNA extraction with magnetic beads and QIAamp Circulating Nucleic Acid kit after optimization. \*DNA gBlocks were spiked in the plasma sample, if no patient plasma was used. The concentration of the gBlock DNA is dependent on the experimental setup ( $10^5$  DNA copies/ml plasma –  $10^2$  DNA copies/ml plasma).

| <b>Reagents</b>                                                                                              | <b>Volume</b> | <b>Required handling steps</b>                                                                                                                                                                                                                                              |
|--------------------------------------------------------------------------------------------------------------|---------------|-----------------------------------------------------------------------------------------------------------------------------------------------------------------------------------------------------------------------------------------------------------------------------|
| <b>Sample (plasma)</b>                                                                                       | 1000 $\mu$ l  | <ul style="list-style-type: none"> <li>• 30s mixing by pulse vortexing</li> <li>• Incubate @ 60°C for 30 min</li> </ul>                                                                                                                                                     |
| <b>DNA gBlock*</b>                                                                                           | 1 $\mu$ l     |                                                                                                                                                                                                                                                                             |
| <b>Proteinase K</b>                                                                                          | 100 $\mu$ l   |                                                                                                                                                                                                                                                                             |
| <b>ACL (lysis) buffer</b>                                                                                    | 800 $\mu$ l   |                                                                                                                                                                                                                                                                             |
| <b>ACB (binding) buffer</b>                                                                                  | 1800 $\mu$ l  | <ul style="list-style-type: none"> <li>• 15-30s mixing by pulse vortexing</li> <li>• Incubate on ice for 5 min</li> </ul>                                                                                                                                                   |
| <b>Magnetic silica beads</b><br><i>Magtivio</i><br><i>MD0200010002</i><br><i>LOT:</i><br><i>NAF10702191C</i> | 40 $\mu$ l    | <ul style="list-style-type: none"> <li>• Pipette the whole volume (3.7 ml) on beads in two steps (1.85 ml each)</li> <li>• Incubate after each step for 5 min on rotation wheel</li> <li>• Collect beads in magnet rack for 1 min</li> <li>• Discard supernatant</li> </ul> |
| <b>ACW1 (washing) buffer</b>                                                                                 | 600 $\mu$ l   | <ul style="list-style-type: none"> <li>• Pipette 10x up and down</li> <li>• Collect beads in magnet rack for 1 min</li> <li>• Discard supernatant</li> </ul>                                                                                                                |
| <b>ACW2 (washing) buffer</b>                                                                                 | 750 $\mu$ l   | <ul style="list-style-type: none"> <li>• Pipette 10x up and down</li> <li>• Collect beads in magnet rack for 1 min</li> <li>• Discard supernatant</li> </ul>                                                                                                                |
| <b>96-100% ethanol non-denatured</b>                                                                         | 750 $\mu$ l   | <ul style="list-style-type: none"> <li>• Pipette 10x up and down</li> <li>• Collect beads in magnet rack for 1 min</li> <li>• Discard supernatant</li> <li>• Open lid incubation @ 56°C for 10 min</li> </ul>                                                               |
| <b>AVE (elution) buffer</b>                                                                                  | 100 $\mu$ l   | <ul style="list-style-type: none"> <li>• Pipette 10x up and down</li> <li>• Incubate 3 min on beads</li> <li>• Collect beads in magnet rack for 1 min</li> <li>• Store supernatant in eluate tube @ -20°C</li> </ul>                                                        |

*ESI: Nanobead handling on a centrifugal microfluidic LabDisk for automated extraction of cell-free circulating DNA with high recovery rates*

**Table S3** Extraction protocol for cfDNA extraction with spin column and QIAamp Circulating Nucleic Acid kit. \*DNA gBlocks were spiked in the plasma sample, if no patient plasma was used. The concentration of the gBlock DNA is dependent on the experimental setup ( $10^5$  DNA copies/ml plasma –  $10^2$  DMA copies/ml plasma).

| <b>Reagents</b>                      | <b>Volume</b> | <b>Required handling steps</b>                                                                                                                                                                                                                                                                                                          |
|--------------------------------------|---------------|-----------------------------------------------------------------------------------------------------------------------------------------------------------------------------------------------------------------------------------------------------------------------------------------------------------------------------------------|
| <b>Sample (Plasma)</b>               | 1000 $\mu$ l  | <ul style="list-style-type: none"> <li>• 30s mixing by pulse vortexing</li> <li>• Incubate @ 60°C for 30 min</li> </ul>                                                                                                                                                                                                                 |
| <b>DNA gBlock*</b>                   | 1 $\mu$ l     |                                                                                                                                                                                                                                                                                                                                         |
| <b>Proteinase K</b>                  | 100 $\mu$ l   |                                                                                                                                                                                                                                                                                                                                         |
| <b>ACL (lysis) Buffer</b>            | 800 $\mu$ l   |                                                                                                                                                                                                                                                                                                                                         |
| <b>ACB (binding) Buffer</b>          | 1800 $\mu$ l  | <ul style="list-style-type: none"> <li>• 15-30s mixing by pulse vortexing</li> <li>• Incubate on ice for 5 min</li> <li>• Pipette the whole volume (3.7 ml) on membrane in six steps (0.7 ml each)</li> <li>• Centrifuge @ 5000 rpm for 0.5 min after each step</li> <li>• Discard liquid in collection tube after each step</li> </ul> |
| <b>ACW1 (washing) Buffer</b>         | 600 $\mu$ l   | <ul style="list-style-type: none"> <li>• Pass directly through membrane</li> <li>• Centrifuge @ 5000 rpm for 0.5 min</li> <li>• Discard liquid in collection tube</li> </ul>                                                                                                                                                            |
| <b>ACW2 (washing) buffer</b>         | 750 $\mu$ l   | <ul style="list-style-type: none"> <li>• Pass directly through membrane</li> <li>• Centrifuge @ 5000 rpm for 0.5 min</li> <li>• Discard liquid in collection tube</li> </ul>                                                                                                                                                            |
| <b>96-100% ethanol non-denatured</b> | 750 $\mu$ l   | <ul style="list-style-type: none"> <li>• Pass directly through membrane</li> <li>• Centrifuge @ 5000 rpm for 0.5 min</li> <li>• Place spin column in new tube</li> <li>• Centrifuge @ 10,000 rpm for 3 min</li> <li>• Place spin column in new tube</li> <li>• Open lid incubation @ 56°C for 10 min</li> </ul>                         |
| <b>AVE (elution) Buffer</b>          | 100 $\mu$ l   | <ul style="list-style-type: none"> <li>• Incubate 3 min on membrane</li> <li>• Centrifuge @ 10,000 rpm for 1 min</li> <li>• Store eluate in tube @ -20°C</li> </ul>                                                                                                                                                                     |

*ESI: Nanobead handling on a centrifugal microfluidic LabDisk for automated extraction of cell-free circulating DNA with high recovery rates*

**Table S4** Cycling parameters for ddPCR 2-plex assay in Stilla Naica system.

| <b>Step</b>             | <b>Time</b>                    | <b>Temperature</b> |
|-------------------------|--------------------------------|--------------------|
| <b>Partitioning</b>     | Default parameters from Stilla |                    |
| <b>Hotstart</b>         | 300 s                          | 95°C               |
| <b>Cycling</b>          | 45x                            |                    |
| <b>Denaturation</b>     | 15 s                           | 95°C               |
| <b>Annealing</b>        | 60 s                           | 54°C               |
| <b>Pressure release</b> | Default parameters from Stilla |                    |

**Table S5** Cycling parameters for qPCR 2-plex assay in RotorGene Q.

| <b>Step</b>                | <b>Time</b> | <b>Temperature</b>                                |
|----------------------------|-------------|---------------------------------------------------|
| <b>Hotstart</b>            | 300 s       | 95°C                                              |
| <b>Cycling</b>             | 45x         |                                                   |
| <b>Denaturation</b>        | 15 s        | 95°C                                              |
| <b>Annealing + Readout</b> | 40 s        | 56°C<br>Readout channel gain:<br>Red: 8; Green 10 |

**Table S6** Final concentration of components in reaction mix for qPCR and ddPCR.

| <b>Component</b>                           | <b>Final concentration in qPCR in nM</b> | <b>Final concentration in ddPCR in nM</b> |
|--------------------------------------------|------------------------------------------|-------------------------------------------|
| <b>Forward primer</b>                      | 300                                      | 500                                       |
| <b>Reverse primer</b>                      | 300                                      | 1200                                      |
| <b>Mediator probe</b>                      | 200                                      | 1200                                      |
| <b>Universal reporter</b>                  | 100                                      | 240                                       |
| <b>Fluorescein</b>                         | n.a.                                     | 100                                       |
| <b>PerfeCTa Multiplex qPCR Toughmix 5x</b> | 1x                                       | 1x                                        |

**ESI: Nanobead handling on a centrifugal microfluidic LabDisk for automated extraction of cell-free circulating DNA with high recovery rates**

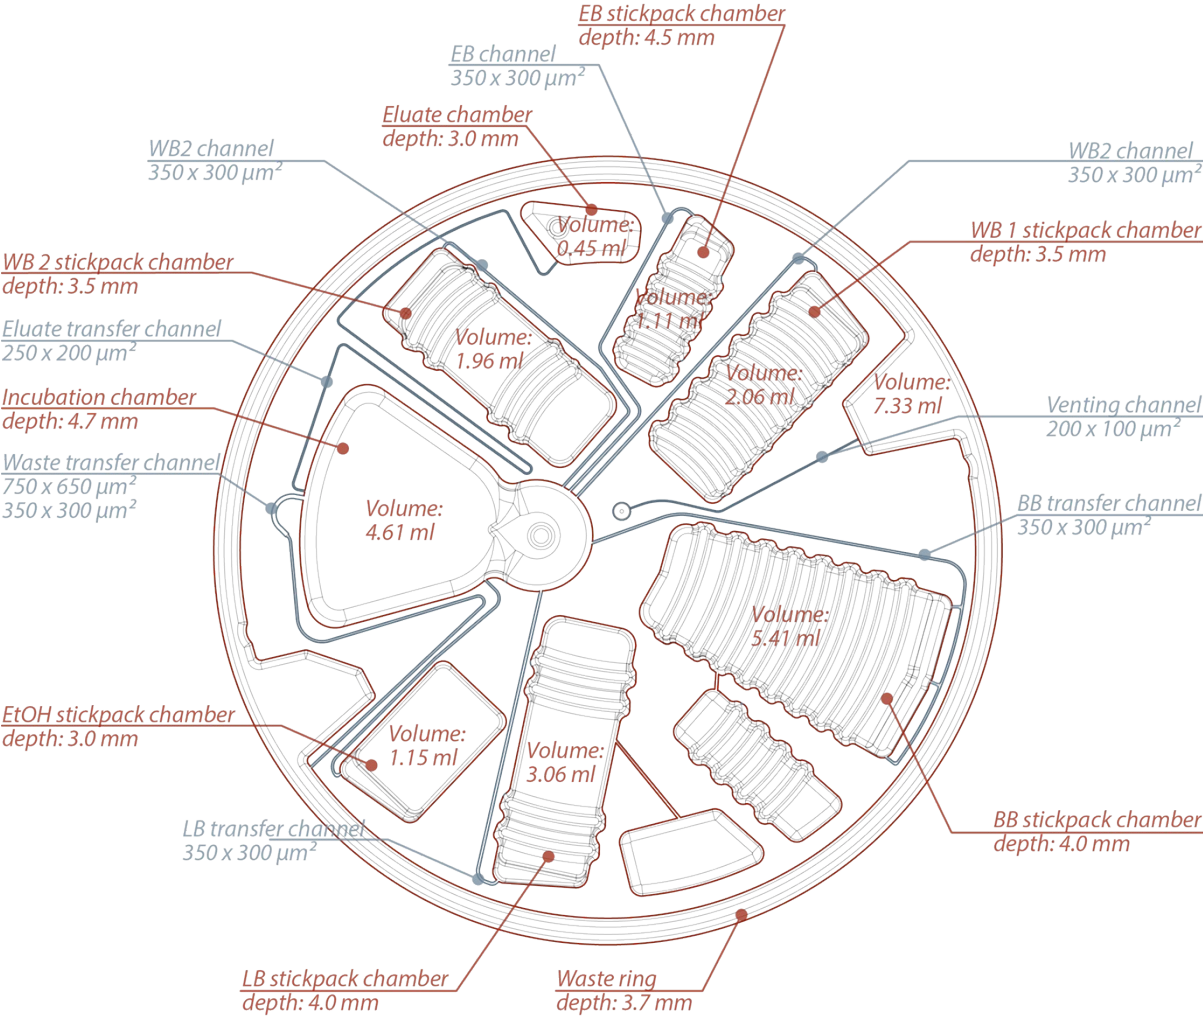

*width x depth*

**Figure S1** Channel and chamber dimensions of LabDisk for cfDNA extraction. The outer diameter of the LabDisk is 140 mm, the outer diameter of the ring structure for the waste is 134 mm.

**ESI: Nanobead handling on a centrifugal microfluidic LabDisk for automated extraction of cell-free circulating DNA with high recovery rates**

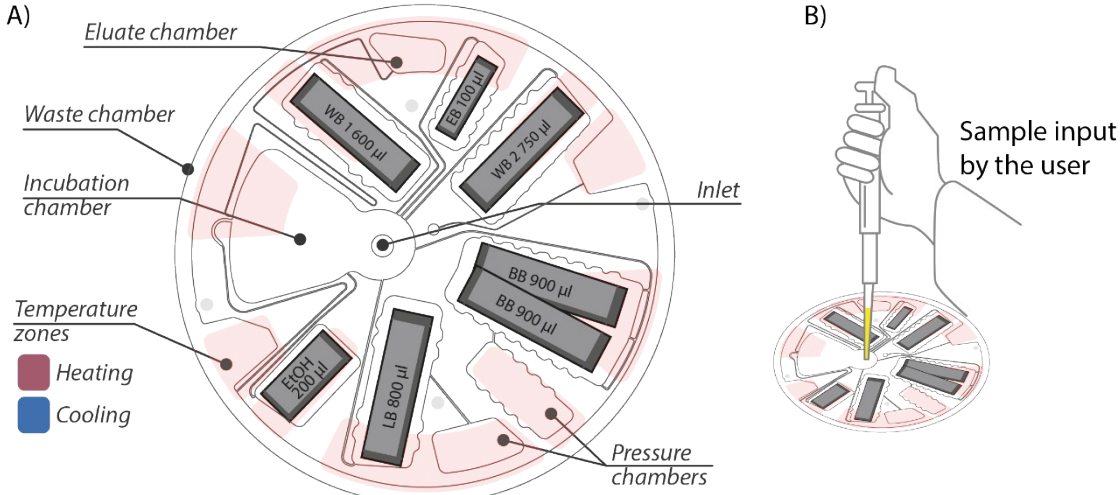

cfDNA LabDisk equipped with extraction buffer stickpacks

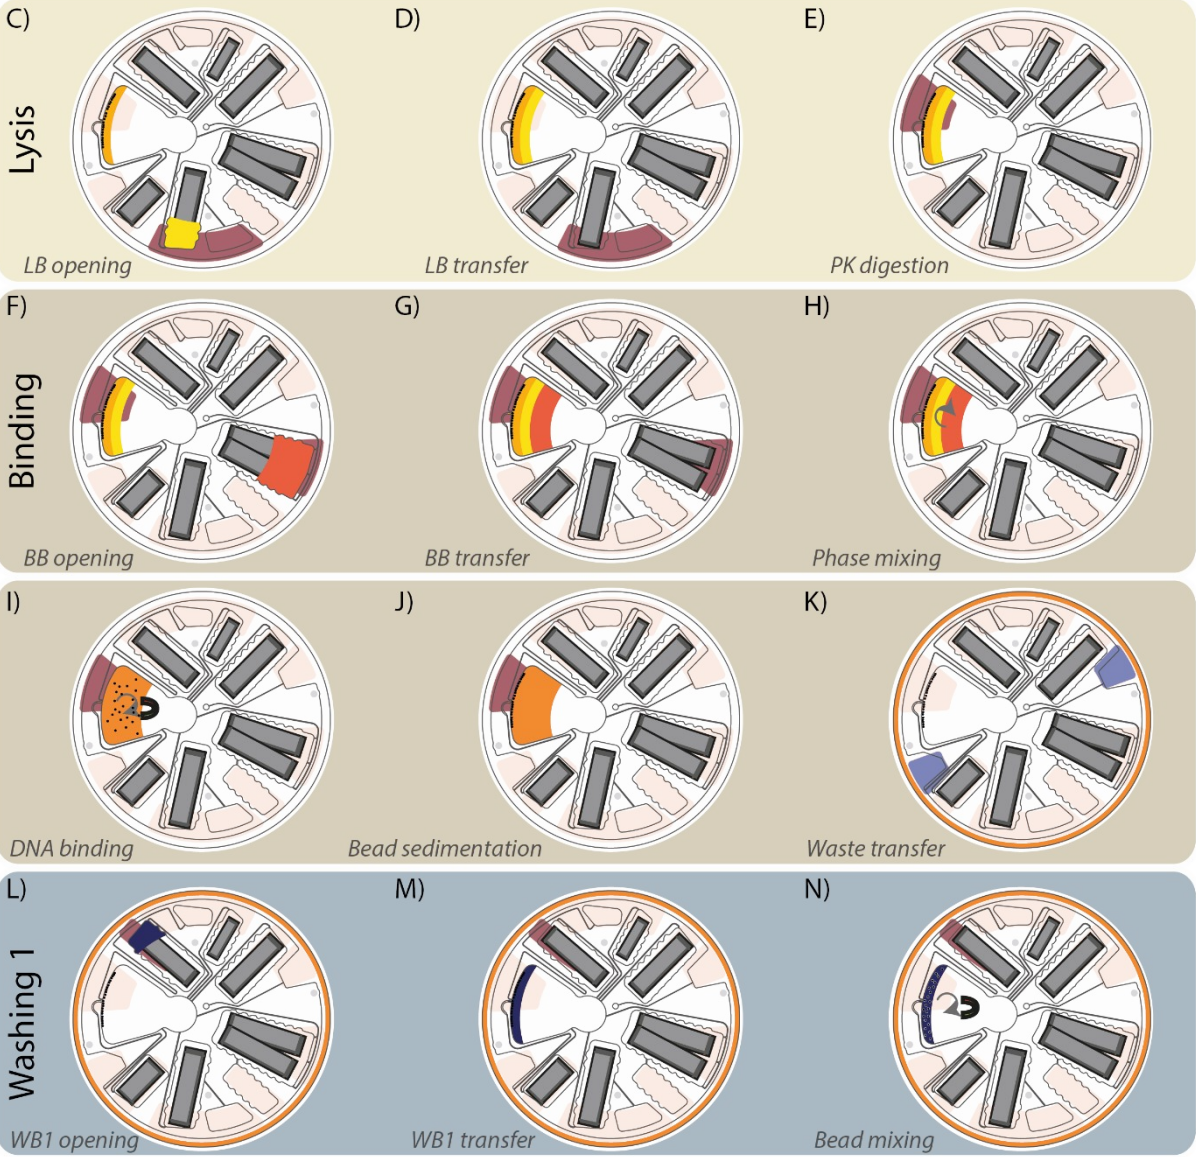

Figure is continued on the next page



*ESI: Nanobead handling on a centrifugal microfluidic LabDisk for automated extraction of cell-free circulating DNA with high recovery rates*

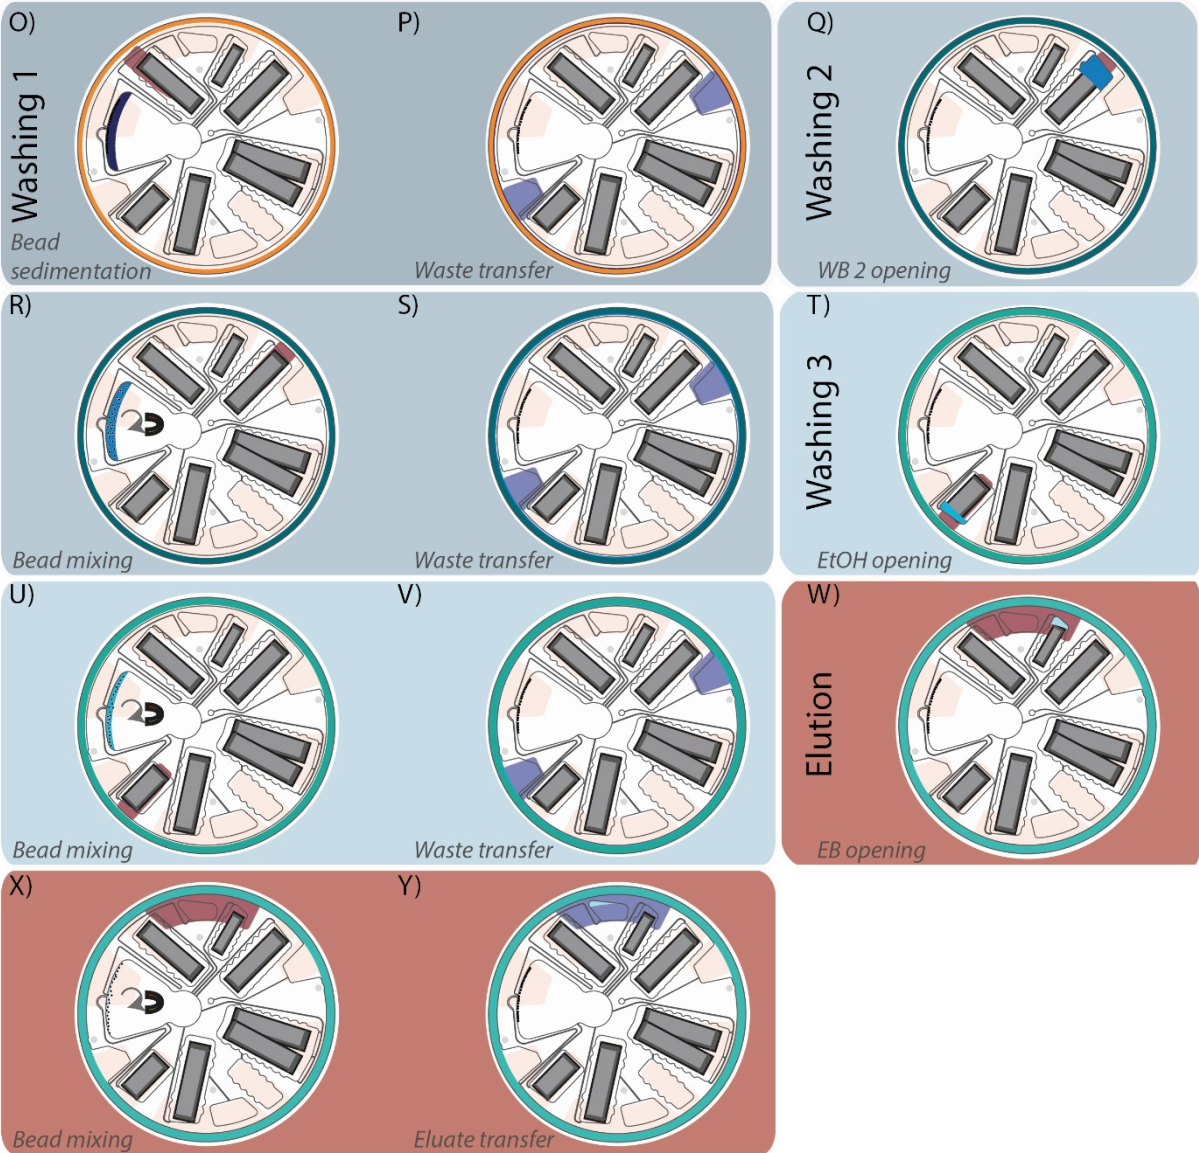

**Figure S2** Microfluidic workflow for cfDNA extraction on an integrated LabDisk.

*ESI: Nanobead handling on a centrifugal microfluidic LabDisk for automated extraction of cell-free circulating DNA with high recovery rates*

**Evaluation of nanobead manipulation concept.** To evaluate the three different designs for (Figure S3) retaining the nanobeads in the incubation chamber, three concepts were tested with spiking experiments. A synthetic DNA fragment of the tropical crawl frog (*Xenopus tropicalis*) with a length of 131 bp and a concentration of  $10^4$  DNA copies was spiked into 300  $\mu\text{l}$  of plasma sample. Figure S4 shows that Design 3 had the best performance in respect to both the Ct-value (the lower, the higher the recovery rate). Moreover, Design 2 was prone to errors related to clogging of the channel by nanobeads (no SD could be calculated, because only one run out of 3 was successful). The higher Ct-values of Design 1 can be attributed to the 8  $\mu\text{l}$  residual volume left in the chamber after transfer. This means that buffers are carried over into each subsequent step and the eluate is very likely contaminated by washing buffer. Consequently, Design 3 was chosen for the integration into the cfDNA extraction workflow on the LabDisk. Furthermore, we demonstrated that even beads with a diameter down to several hundred nanometres can be successfully retained in a single centrifugal microfluidic chamber while changing buffers. This is advantageous in comparison to microfluidic approaches where the beads need to be transferred from chamber to chamber to change buffers, as the space requirement on the LabDisk is significantly reduced.

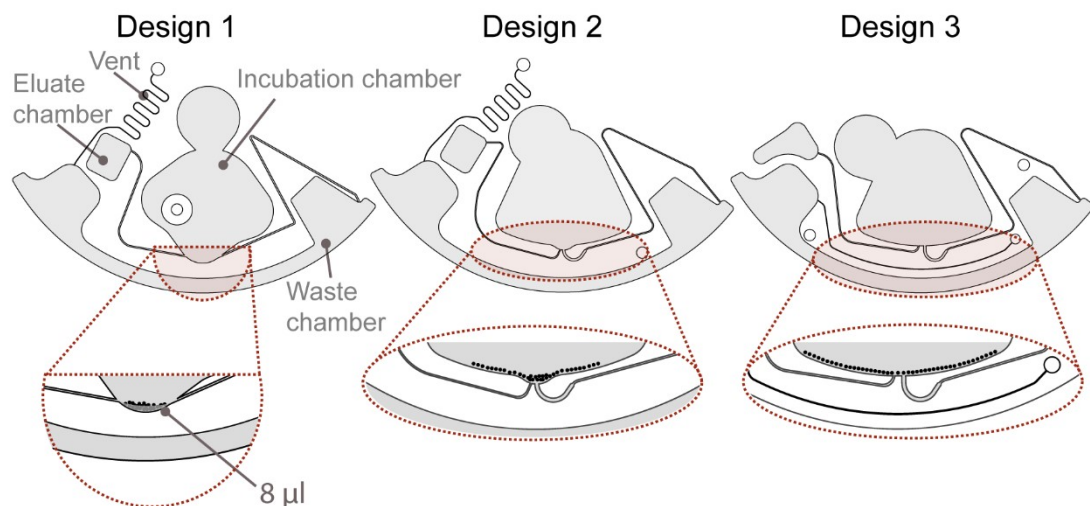

**Figure S3** Evaluated concepts of a chamber geometry to retain nanobeads in the incubation chamber. Each design includes an incubation chamber, a waste chamber connected by a channel to a vent and an eluate collection chamber. Design 1: The transfer channels for both the eluate and waste transfers all but 8  $\mu\text{l}$  of the liquid out of the chamber. The nanobeads are collected in this 8  $\mu\text{l}$  cavity. Design 2: Here, the nanobeads are collected on the outer rim with a slope of  $15^\circ$  to efficiently transport the liquids out of the chamber. The chamber has an additional cavity in the centre of the rim to establish a more defined spot for elution. Design 3: Same principle as in Design 2, but without the additional cavity. For direct comparison, the three design variants were included on one single LabDisk and their volume reduced by a factor of three. Each incubation chamber is connected to a waste and to an eluate chamber. A resistance channel vents the waste. The sample and buffers are pipetted manually into the incubation chamber during the fluidic protocol, which makes it necessary to stop the processing device at the appropriate time points. In each of the three design variants, a different concept to retain the nanobeads is evaluated. Design 1 is characterized by a nanobead collection structure, which was designed in such a way that the downstream transfer channel is radially inward to a residual volume of 8  $\mu\text{l}$  in the chamber. In this volume, the nanobeads can be sedimented. This guarantees liquid transfer from the chamber without affecting the sedimented nanobeads. Designs 2 and 3 collect the nanobeads on their radially outward rim ( $15^\circ$  slope to guarantee the drainage of the liquid). Design 2 has an additional

*ESI: Nanobead handling on a centrifugal microfluidic LabDisk for automated extraction of cell-free circulating DNA with high recovery rates*

cavity at the outlet to collect the nanobeads and potentially improve elution, which is carried out with comparably low liquid volumes (100 µl). Design 3 has no additional elements to collect the nanobeads.

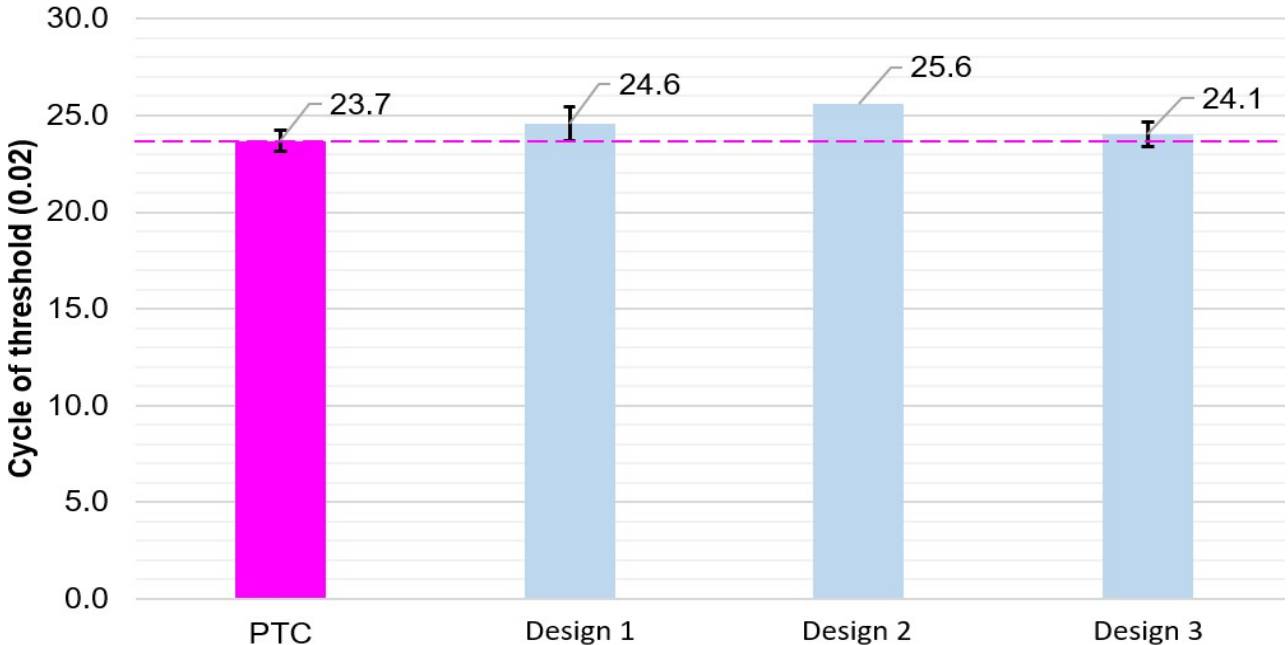

**Figure S4** Evaluation of bead manipulation concept in three different incubation chambers (n=3). The DNA concentration in the PTC was defined to an extraction recovery of 100%. Design 1 showed a cycle of threshold (Ct) of  $24.6 \pm 0.9$ , Design 2 of 25.6 and Design 3 of  $24.1 \pm 0.6$ .

**ESI: Nanobead handling on a centrifugal microfluidic LabDisk for automated extraction of cell-free circulating DNA with high recovery rates**

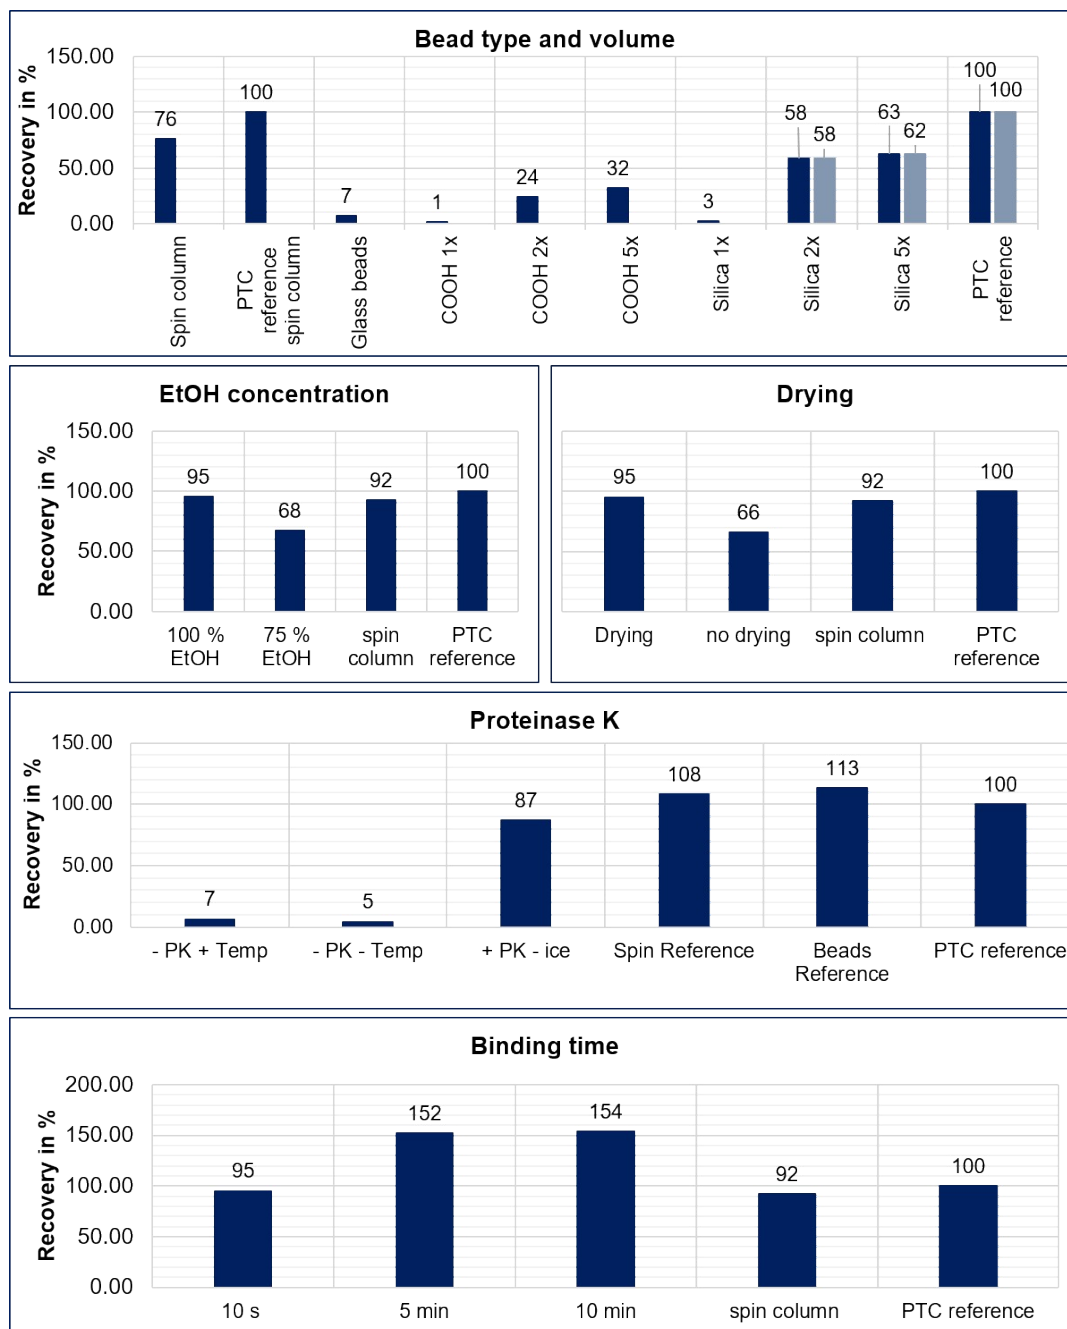

**Figure S5** Optimization results for the bead-based approach in the manual workflow. The main impact for the optimization was found to be the EtOH concentration, bead drying and binding time. Moreover, modified beads with silica groups on the surface were the most suitable beads to establish the binding of the DNA to their surface with the buffer system used.

*ESI: Nanobead handling on a centrifugal microfluidic LabDisk for automated extraction of cell-free circulating DNA with high recovery rates*

DNA adsorption in LabDisk

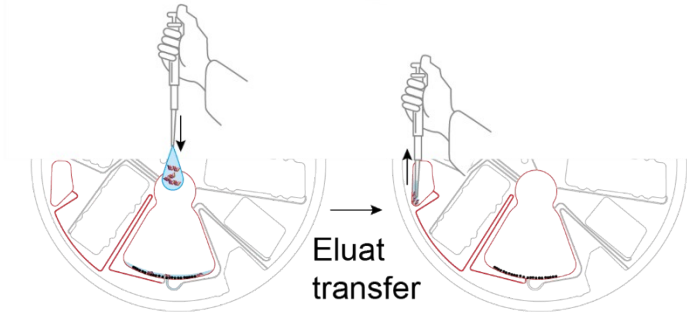

Positive control

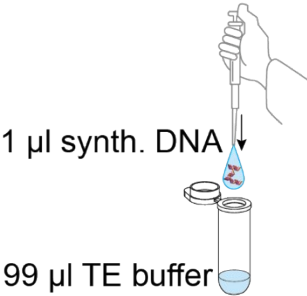

1 µl synth. DNA in 99 µl TE buffer

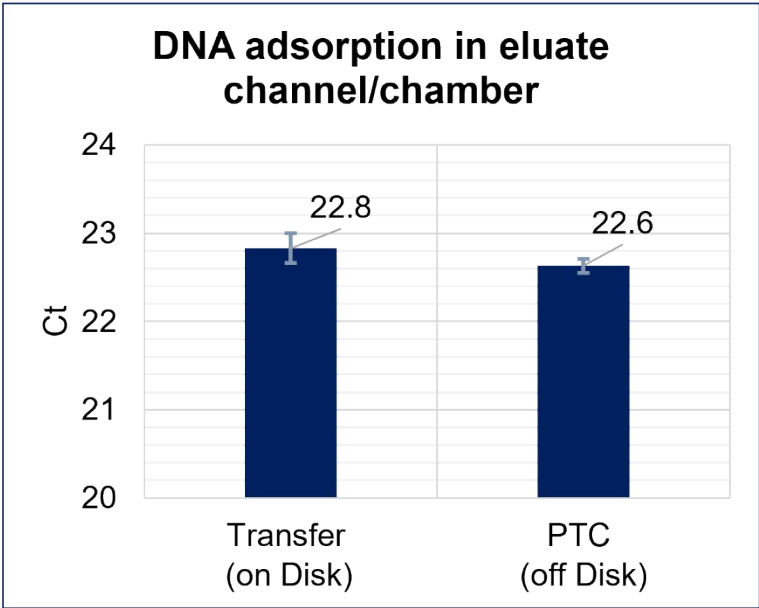

**Figure S6** DNA adsorption in eluate channel and incubation chamber. Standard deviation on Disk: 0.3 and off Disk 0.2. DNA adsorption in LabDisk is found to be neglectable.

ESI: Nanobead handling on a centrifugal microfluidic LabDisk for automated extraction of cell-free circulating DNA with high recovery rates

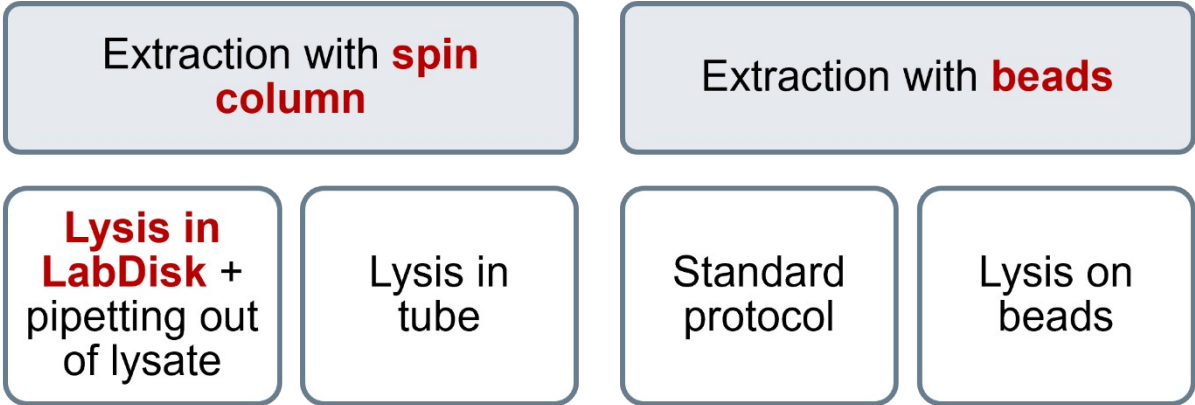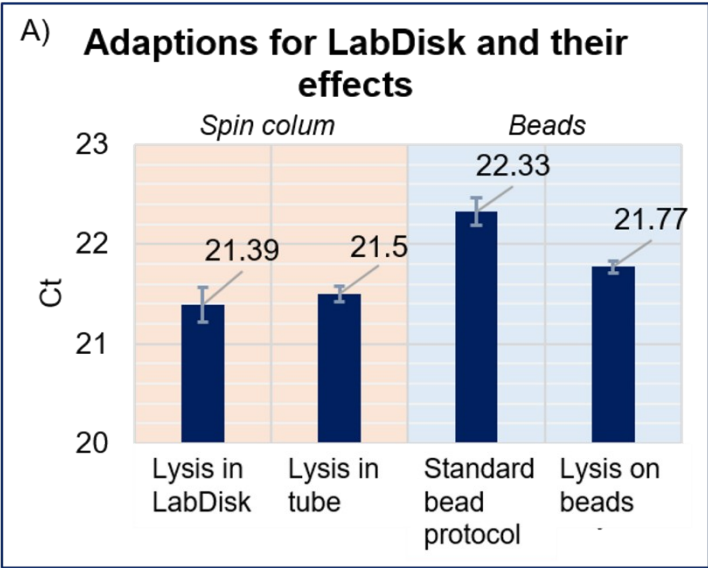

**Figure S7** Influencing parameters for lysis efficiency (lysis in LabDisk and lysis with beads present). There is no negative effect for performing the lysis in the LabDisk and in presence of beads.

ESI: Nanobead handling on a centrifugal microfluidic LabDisk for automated extraction of cell-free circulating DNA with high recovery rates

**Table S7** Temperature and frequency for cfDNA LabDisk processing.

| STEP | DESCRIPTION                 | PARAMETER 1                                | PARAMETER 2 | PARAMETER 3         | PARAMETER 4                    |
|------|-----------------------------|--------------------------------------------|-------------|---------------------|--------------------------------|
| 1    | <b>OpMode</b>               | Vaccum pump error when pressure > 670 mbar |             | 3300                |                                |
| 2    | <b>CoolingFan</b>           | Cooling fan on                             |             |                     |                                |
| 3    | <b>OpMode</b>               | Define rotor height, here 270              |             |                     |                                |
| 4    |                             | Temperature zone                           | 64          | Temperature 25°C    | Time out 30s Heating power 75% |
| 5    |                             | Temperature zone                           | 32          | Temperature 80°C    | Time out 30s Heating power 75% |
| 6    | <b>LB stickpack opening</b> | Frequency                                  | 5 Hz        | Acceleration 5 Hz/s | Deceleration 5 Hz/s            |
| 7    |                             | Wait                                       | 10 s        |                     |                                |
| 8    |                             | Frequency                                  | 35 Hz       | Acceleration 5 Hz/s | Deceleration 5 Hz/s            |
| 9    |                             | Wait                                       | 30 s        |                     |                                |
| 10   |                             | Temperature zone                           | 14          | Temperature 100°C   | Time out 30s Heating power 75% |
| 11   |                             | Wait                                       | 60 s        |                     |                                |
| 12   | <b>LB transfer</b>          | Loop start                                 |             |                     |                                |
| 13   |                             | Frequency                                  | 35 Hz       | Acceleration 5 Hz/s | Deceleration 5 Hz/s            |
| 14   |                             | Temperature zone                           | 14          | Temperature 95°C    | Time out 300 Heating power 75% |
| 15   |                             | Wait                                       | 60s         |                     |                                |
| 16   |                             | Frequency                                  | 3 Hz        | Acceleration 5 Hz/s | Deceleration 5 Hz/s            |
| 17   |                             | Wait                                       | 60s         |                     |                                |
| 18   |                             | Temperature zone                           | 14          | Temperature 25°C    | Time out 30s Heating power 75% |
| 19   |                             | Wait                                       | 60s         |                     |                                |
| 20   |                             | Loop end                                   |             | # of loops 6        |                                |
| 21   |                             | Frequency                                  | 35 Hz       | Acceleration 5 Hz/s | Deceleration 5 Hz/s            |
| 22   |                             | Temperature zone                           | 14          | Temperature 95°C    | Time out 30s Heating power 75% |
| 23   | Wait                        | 60s                                        |             |                     |                                |

*ESI: Nanobead handling on a centrifugal microfluidic LabDisk for automated extraction of cell-free circulating DNA with high recovery rates*

| <i>STEP</i> | <i>Description</i> | <i>Parameter 1</i>    | <i>Parameter 2</i> | <i>Parameter 3</i> | <i>Parameter 4</i> |              |              |               |     |
|-------------|--------------------|-----------------------|--------------------|--------------------|--------------------|--------------|--------------|---------------|-----|
| 24          | <b>Mixing</b>      | Frequency             | 3 Hz               | Acceleration       | 5 Hz/s             | Deceleration | 5 Hz/s       |               |     |
| 25          |                    | Wait                  | 60s                |                    |                    |              |              |               |     |
| 26          |                    | Stop temperature zone | 14                 |                    |                    |              |              |               |     |
| 27          |                    | Loop start            | 1                  |                    |                    |              |              |               |     |
| 28          |                    | Frequency             | 30 Hz              | Acceleration       | 5 Hz/s             | Deceleration | 5 Hz/s       |               |     |
| 29          |                    | Wait                  | 6 s                |                    |                    |              |              |               |     |
| 30          |                    | Frequency             | 3 Hz               | Acceleration       | 5 Hz/s             | Deceleration | 5 Hz/s       |               |     |
| 31          |                    | Wait                  | 6 s                |                    |                    |              |              |               |     |
| 32          |                    | Loop end              |                    | # of loops         | 20                 |              |              |               |     |
| 33          |                    | <b>Lysis 30 min</b>   | Frequency          | 5 Hz               | Acceleration       | 5 Hz/s       | Deceleration | 5 Hz/s        |     |
| 34          | Temperature zone   |                       | 64                 | Temperature        | 60°C               | Time out     | 60s          | Heating power | 75% |
| 35          | Loop start         |                       | 1                  |                    |                    |              |              |               |     |
| 36          | Wait               |                       | 60s                |                    |                    |              |              |               |     |
| 37          | Loop end           |                       | # of loops         | 30                 |                    |              |              |               |     |
| 38          | <b>BB opening</b>  | Frequency             | 35 Hz              | Acceleration       | 5 Hz/s             | Deceleration | 5 Hz/s       |               |     |
| 39          |                    | Wait                  | 30s                |                    |                    |              |              |               |     |
| 40          |                    | Temperature zone      | 8193               | Temperature        | 100°C              | Time out     | 30s          | Heating power | 75% |
| 41          | <b>BB transfer</b> | Wait                  | 60 s               |                    |                    |              |              |               |     |
| 42          |                    | Loop start            | 1                  |                    |                    |              |              |               |     |
| 43          |                    | Frequency             | 30 Hz              | Acceleration       | 5 Hz/s             | Deceleration | 5 Hz/s       |               |     |
| 44          |                    | Temperature zone      | 8193               | Temperature        | 95°C               | Time out     | 30s          | Heating power | 75% |
| 45          |                    | Wait                  | 60 s               |                    |                    |              |              |               |     |
| 46          |                    | Frequency             | 5 Hz               | Acceleration       | 5 Hz/s             | Deceleration | 5 Hz/s       |               |     |
| 47          |                    | Wait                  | 60 s               |                    |                    |              |              |               |     |
| 48          |                    | Temperature zone      | 8193               | Temperature        | 25°C               | Time out     | 30s          | Heating power | 75% |
| 49          |                    | Wait                  | 60 s               |                    |                    |              |              |               |     |
| 50          |                    | Loop end              |                    | # of loops         | 6                  |              |              |               |     |



*ESI: Nanobead handling on a centrifugal microfluidic LabDisk for automated extraction of cell-free circulating DNA with high recovery rates*

|             |                        |                       |                    |                    |              |                    |        |                    |     |
|-------------|------------------------|-----------------------|--------------------|--------------------|--------------|--------------------|--------|--------------------|-----|
| 51          |                        | Frequency             | 35 Hz              | Acceleration       | 5 Hz/s       | Deceleration       | 5 Hz/s |                    |     |
| 52          |                        | Temperature zone      | 8193               | Temperature        | 100°C        | Time out           | 30s    | Heating power      | 75% |
| <b>STEP</b> | <b>Description</b>     |                       | <b>Parameter 1</b> | <b>Parameter 2</b> |              | <b>Parameter 3</b> |        | <b>Parameter 4</b> |     |
| 53          | <b>Buffer mixing</b>   | Wait                  | 60 s               |                    |              |                    |        |                    |     |
| 54          |                        | Frequency             | 5 Hz               | Acceleration       | 5 Hz/s       | Deceleration       | 5 Hz/s |                    |     |
| 55          |                        | Wait                  | 60 s               |                    |              |                    |        |                    |     |
| 56          |                        | Stop temperature zone | 8193               |                    |              |                    |        |                    |     |
| 57          |                        | Loop start            | 1                  |                    |              |                    |        |                    |     |
| 58          |                        | Frequency             | 30 Hz              | Acceleration       | 5 Hz/s       | Deceleration       | 5 Hz/s |                    |     |
| 59          |                        | Wait                  | 6 s                |                    |              |                    |        |                    |     |
| 60          |                        | Frequency             | 3 Hz               | Acceleration       | 5 Hz/s       | Deceleration       | 5 Hz/s |                    |     |
| 61          |                        | Wait                  | 6 s                |                    |              |                    |        |                    |     |
| 62          |                        | Loop end              |                    | # of loops         | 15           |                    |        |                    |     |
| 63          |                        | Frequency             | 5 Hz               | Acceleration       | 5 Hz/s       | Deceleration       | 5 Hz/s |                    |     |
| 64          |                        | <b>Cooling</b>        | Loop start         | 1                  |              |                    |        |                    |     |
| 65          |                        | Temperature zone      | 64                 | Temperature        | 15°C         | Time out           | 600    | Heating power      | 75% |
| 66          |                        | Wait                  | 60s                |                    |              |                    |        |                    |     |
| 67          |                        | Loop end              |                    | # of loops         | 5            |                    |        |                    |     |
| 68          | <b>Binding 10 min</b>  | Start timed loop      | 2                  |                    |              |                    |        |                    |     |
| 69          | Frequency              | 5 Hz                  | Acceleration       | 5 Hz/s             | Deceleration | 5 Hz/s             |        |                    |     |
| 70          | Wait                   | 5 s                   |                    |                    |              |                    |        |                    |     |
| 71          | Frequency              | 10 Hz                 | Acceleration       | 5 Hz/s             | Deceleration | 5 Hz/s             |        |                    |     |
| 72          | Wait                   | 5 s                   |                    |                    |              |                    |        |                    |     |
| 73          | End timed loop         | 2                     | Duration           | 10 min             |              |                    |        |                    |     |
| 74          | Stop temperature zone  | 64                    |                    |                    |              |                    |        |                    |     |
| 75          | <b>Magnet movement</b> | Frequency             | 5 Hz               | Acceleration       | 5 Hz/s       | Deceleration       | 5 Hz/s |                    |     |
| 76          | Wait                   | 20 s                  |                    |                    |              |                    |        |                    |     |
| 77          | <b>Waste 1</b>         | Frequency             | 30 Hz              | Acceleration       | 5 Hz/s       | Deceleration       | 5 Hz/s |                    |     |

*ESI: Nanobead handling on a centrifugal microfluidic LabDisk for automated extraction of cell-free circulating DNA with high recovery rates*

|             |                              |                       |                    |                    |        |                    |        |                    |     |
|-------------|------------------------------|-----------------------|--------------------|--------------------|--------|--------------------|--------|--------------------|-----|
| 78          |                              | Wait                  | 5 s                |                    |        |                    |        |                    |     |
| 79          |                              | Temperature zone      | 4128               | Temperature        | 90°C   | Time out           | 60 s   | Heating power      | 75% |
| 80          |                              | Wait                  | 50s                |                    |        |                    |        |                    |     |
| <b>STEP</b> | <b>Description</b>           |                       | <b>Parameter 1</b> | <b>Parameter 2</b> |        | <b>Parameter 3</b> |        | <b>Parameter 4</b> |     |
| 81          |                              | Frequency             | 3 Hz               | Acceleration       | 5 Hz/s | Deceleration       | 5 Hz/s |                    |     |
| 82          |                              | Wait                  | 10s                |                    |        |                    |        |                    |     |
| 83          |                              | Temperature zone      | 4128               | Temperature        | 20°C   | Time out           | 60 s   | Heating power      | 75% |
| 84          |                              | Wait                  | 3 s                |                    |        |                    |        |                    |     |
| 85          |                              | Frequency             | 25 Hz              | Acceleration       | 5 Hz/s | Deceleration       | 5 Hz/s |                    |     |
| 86          |                              | Loop start            | 1                  |                    |        |                    |        |                    |     |
| 87          |                              | Wait                  | 60 s               |                    |        |                    |        |                    |     |
| 88          |                              | Loop end              |                    | # of loops         | 5      |                    |        |                    |     |
| 89          |                              | Stop temperature zone | 4128               |                    |        |                    |        |                    |     |
| 90          | <b>WB1 stickpack opening</b> | Frequency             | 35 Hz              | Acceleration       | 5 Hz/s | Deceleration       | 5 Hz/s |                    |     |
| 91          |                              | Wait                  | 30 s               |                    |        |                    |        |                    |     |
| 92          |                              | Temperature zone      | 2048               | Temperature        | 100°C  | Time out           | 30 s   | Heating power      | 75% |
| 93          |                              | Wait                  | 60 s               |                    |        |                    |        |                    |     |
| 94          | <b>WB1 transfer</b>          | Loop start            | 1                  |                    |        |                    |        |                    |     |
| 95          |                              | Frequency             | 35 Hz              | Acceleration       | 5 Hz/s | Deceleration       | 5 Hz/s |                    |     |
| 96          |                              | Temperature zone      | 2048               | Temperature        | 95°C   | Time out           | 30 s   | Heating power      | 75% |
| 97          |                              | Wait                  | 20 s               |                    |        |                    |        |                    |     |
| 98          |                              | Frequency             | 10 Hz              | Acceleration       | 5 Hz/s | Deceleration       | 5 Hz/s |                    |     |
| 99          |                              | Wait                  | 20 s               |                    |        |                    |        |                    |     |
| 100         |                              | Frequency             | 5 Hz               | Acceleration       | 5 Hz/s | Deceleration       | 5 Hz/s |                    |     |
| 101         |                              | Wait                  | 20 s               |                    |        |                    |        |                    |     |
| 102         |                              | Temperature zone      | 2048               | Temperature        | 25°C   | Time out           | 30 s   | Heating power      | 75% |
| 103         |                              | Wait                  | 30 s               |                    |        |                    |        |                    |     |
| 104         |                              | Loop end              |                    | # of loops         | 2      |                    |        |                    |     |

*ESI: Nanobead handling on a centrifugal microfluidic LabDisk for automated extraction of cell-free circulating DNA with high recovery rates*

|      |                        |                       |             |              |        |              |        |               |     |
|------|------------------------|-----------------------|-------------|--------------|--------|--------------|--------|---------------|-----|
| 105  |                        | Frequency             | 35 Hz       | Acceleration | 5 Hz/s | Deceleration | 5 Hz/s |               |     |
| 106  |                        | Temperature zone      | 2048        | Temperature  | 95°C   | Time out     | 30 s   | Heating power | 75% |
| 107  |                        | Wait                  | 10 s        |              |        |              |        |               |     |
| 108  |                        | Frequency             | 10 Hz       | Acceleration | 5 Hz/s | Deceleration | 5 Hz/s |               |     |
| STEP | Description            |                       | Parameter 1 | Parameter 2  |        | Parameter 3  |        | Parameter 4   |     |
| 109  |                        | Wait                  | 20 s        |              |        |              |        |               |     |
| 110  |                        | Frequency             | 5 Hz        | Acceleration | 5 Hz/s | Deceleration | 5 Hz/s |               |     |
| 111  |                        | Wait                  | 10 s        |              |        |              |        |               |     |
| 112  |                        | Stop temperature zone | 2048        |              |        |              |        |               |     |
| 113  | <b>Washing 1</b>       | Loop start            | 1           |              |        |              |        |               |     |
| 114  |                        | Frequency             | 8 Hz        | Acceleration | 5 Hz/s | Deceleration | 5 Hz/s |               |     |
| 115  |                        | Wait                  | 5 s         |              |        |              |        |               |     |
| 116  |                        | Frequency             | 15 Hz       | Acceleration | 5 Hz/s | Deceleration | 5 Hz/s |               |     |
| 117  |                        | Wait                  | 5 s         |              |        |              |        |               |     |
| 118  |                        | Loop end              |             | # of loops   | 2      |              |        |               |     |
| 119  | <b>Magnet movement</b> | Frequency             | 5 Hz        | Acceleration | 5 Hz/s | Deceleration | 5 Hz/s |               |     |
| 120  |                        | Wait                  | 20 s        |              |        |              |        |               |     |
| 121  | <b>Waste2</b>          | Frequency             | 30 Hz       | Acceleration | 5 Hz/s | Deceleration | 5 Hz/s |               |     |
| 122  |                        | Wait                  | 5 s         |              |        |              |        |               |     |
| 123  |                        | Temperature zone      | 4128        | Temperature  | 90°C   | Time out     | 60 s   | Heating power | 75% |
| 124  |                        | Wait                  | 50 s        |              |        |              |        |               |     |
| 125  |                        | Frequency             | 3 Hz        | Acceleration | 5 Hz/s | Deceleration | 5 Hz/s |               |     |
| 126  |                        | Wait                  | 10 s        |              |        |              |        |               |     |
| 127  |                        | Temperature zone      | 4128        | Temperature  | 20°C   | Time out     | 60 s   | Heating power | 75% |
| 128  |                        | Wait                  | 3 s         |              |        |              |        |               |     |
| 129  |                        | Frequency             | 25 Hz       | Acceleration | 5 Hz/s | Deceleration | 5 Hz/s |               |     |
| 130  |                        | Wait                  | 40 s        |              |        |              |        |               |     |
| 131  |                        | Stop temperature zone | 4128        |              |        |              |        |               |     |

*ESI: Nanobead handling on a centrifugal microfluidic LabDisk for automated extraction of cell-free circulating DNA with high recovery rates*

|      |                              |                       |                    |                    |        |                    |        |                    |     |
|------|------------------------------|-----------------------|--------------------|--------------------|--------|--------------------|--------|--------------------|-----|
| 132  | <b>WB2 stickpack opening</b> | Frequency             | 35 Hz              | Acceleration       | 5 Hz/s | Deceleration       | 5 Hz/s |                    |     |
| 133  |                              | Wait                  | 30 s               |                    |        |                    |        |                    |     |
| 134  |                              | Temperature zone      | 128                | Temperature        | 100°C  | Time out           | 30 s   | Heating power      | 75% |
| 135  |                              | Wait                  | 60 s               |                    |        |                    |        |                    |     |
| 136  | <b>WB2 transfer</b>          | Loop start            | 1                  |                    |        |                    |        |                    |     |
| STEP | <b>Description</b>           |                       | <b>Parameter 1</b> | <b>Parameter 2</b> |        | <b>Parameter 3</b> |        | <b>Parameter 4</b> |     |
| 137  |                              | Frequency             | 35 Hz              | Acceleration       | 5 Hz/s | Deceleration       | 5 Hz/s |                    |     |
| 138  |                              | Temperature zone      | 128                | Temperature        | 100°C  | Time out           | 30 s   | Heating power      | 75% |
| 139  |                              | Wait                  | 10 s               |                    |        |                    |        |                    |     |
| 140  |                              | Frequency             | 10 Hz              | Acceleration       | 5 Hz/s | Deceleration       | 5 Hz/s |                    |     |
| 141  |                              | Wait                  | 20 s               |                    |        |                    |        |                    |     |
| 142  |                              | Frequency             | 5 Hz               | Acceleration       | 5 Hz/s | Deceleration       | 5 Hz/s |                    |     |
| 143  |                              | Wait                  | 20 s               |                    |        |                    |        |                    |     |
| 144  |                              | Temperature zone      | 128                | Temperature        | 25°C   | Time out           | 30 s   | Heating power      | 75% |
| 145  |                              | Wait                  | 30 s               |                    |        |                    |        |                    |     |
| 146  |                              | Loop end              |                    | # of loops         | 2      |                    |        |                    |     |
| 147  |                              | Frequency             | 35 Hz              | Acceleration       | 5 Hz/s | Deceleration       | 5 Hz/s |                    |     |
| 148  |                              | Temperature zone      | 128                | Temperature        | 95°C   | Time out           | 30 s   | Heating power      | 75% |
| 149  |                              | Wait                  | 10 s               |                    |        |                    |        |                    |     |
| 150  |                              | Frequency             | 10 Hz              | Acceleration       | 5 Hz/s | Deceleration       | 5 Hz/s |                    |     |
| 151  |                              | Wait                  | 20 s               |                    |        |                    |        |                    |     |
| 152  |                              | Frequency             | 5 Hz               | Acceleration       | 5 Hz/s | Deceleration       | 5 Hz/s |                    |     |
| 153  |                              | Wait                  | 10 s               |                    |        |                    |        |                    |     |
| 154  |                              | Stop temperature zone | 128                |                    |        |                    |        |                    |     |
| 155  | <b>WB2 washing</b>           | Loop start            | 1                  |                    |        |                    |        |                    |     |
| 156  |                              | Frequency             | 8 Hz               | Acceleration       | 5 Hz/s | Deceleration       | 5 Hz/s |                    |     |
| 157  |                              | Wait                  | 5 s                |                    |        |                    |        |                    |     |
| 158  |                              | Frequency             | 15 Hz              | Acceleration       | 5 Hz/s | Deceleration       | 5 Hz/s |                    |     |

*ESI: Nanobead handling on a centrifugal microfluidic LabDisk for automated extraction of cell-free circulating DNA with high recovery rates*

|             |                               |                       |                    |                    |        |                    |        |                    |
|-------------|-------------------------------|-----------------------|--------------------|--------------------|--------|--------------------|--------|--------------------|
| 159         |                               | Wait                  | 5 s                |                    |        |                    |        |                    |
| 160         |                               | Loop end              |                    | # of loops         | 2      |                    |        |                    |
| 161         | <b>Magnet movement</b>        | Frequency             | 5 Hz               | Acceleration       | 5 Hz/s | Deceleration       | 5 Hz/s |                    |
| 162         |                               | Wait                  | 20 S               |                    |        |                    |        |                    |
| 163         | <b>Waste 3</b>                | Frequency             | 30 Hz              | Acceleration       | 5 Hz/s | Deceleration       | 5 Hz/s |                    |
| 164         |                               | Wait                  | 5 s                |                    |        |                    |        |                    |
| <b>STEP</b> | <b>Description</b>            |                       | <b>Parameter 1</b> | <b>Parameter 2</b> |        | <b>Parameter 3</b> |        | <b>Parameter 4</b> |
| 165         |                               | Temperature zone      | 4128               | Temperature        | 90°C   | Time out           | 60 s   | Heating power 75%  |
| 166         |                               | Wait                  | 50 s               |                    |        |                    |        |                    |
| 167         |                               | Frequency             | 3 Hz               | Acceleration       | 5 Hz/s | Deceleration       | 5 Hz/s |                    |
| 168         |                               | Wait                  | 10 s               |                    |        |                    |        |                    |
| 169         |                               | Temperature zone      | 4128               | Temperature        | 20°C   | Time out           | 60 s   | Heating power 75%  |
| 170         |                               | Wait                  | 3 s                |                    |        |                    |        |                    |
| 171         |                               | Frequency             | 25 Hz              | Acceleration       | 5 Hz/s | Deceleration       | 5 Hz/s |                    |
| 172         |                               | Wait                  | 40 s               |                    |        |                    |        |                    |
| 173         |                               | Stop temperature zone | 4128               |                    |        |                    |        |                    |
| 174         | <b>EtOH stickpack opening</b> | Frequency             | 40 Hz              | Acceleration       | 5 Hz/s | Deceleration       | 5 Hz/s |                    |
| 175         |                               | Wait                  | 30 s               |                    |        |                    |        |                    |
| 176         |                               | Temperature zone      | 16                 | Temperature        | 110°C  | Time out           | 30 s   | Heating power 75%  |
| 177         |                               | Wait                  | 60 s               |                    |        |                    |        |                    |
| 178         | <b>EtOH transfer</b>          | Frequency             | 30 Hz              | Acceleration       | 5 Hz/s | Deceleration       | 5 Hz/s |                    |
| 179         |                               | Temperature zone      | 16                 | Temperature        | 95°C   | Time out           | 30 s   | Heating power 75%  |
| 180         |                               | Wait                  | 10 s               |                    |        |                    |        |                    |
| 181         |                               | Frequency             | 5 Hz               | Acceleration       | 5 Hz/s | Deceleration       | 5 Hz/s |                    |
| 182         |                               | Wait                  | 30 s               |                    |        |                    |        |                    |
| 183         |                               | Temperature zone      | 16                 | Temperature        | 25°C   | Time out           | 30 s   | Heating power 75%  |
| 184         |                               | Wait                  | 30 s               |                    |        |                    |        |                    |
| 185         |                               | Frequency             | 35 Hz              | Acceleration       | 5 Hz/s | Deceleration       | 5 Hz/s |                    |

*ESI: Nanobead handling on a centrifugal microfluidic LabDisk for automated extraction of cell-free circulating DNA with high recovery rates*

|      |                         |                       |                    |                    |        |                    |        |                    |     |
|------|-------------------------|-----------------------|--------------------|--------------------|--------|--------------------|--------|--------------------|-----|
| 186  |                         | Temperature zone      | 16                 | Temperature        | 95°C   | Time out           | 30 s   | Heating power      | 75% |
| 187  |                         | Wait                  | 20 s               |                    |        |                    |        |                    |     |
| 188  |                         | Frequency             | 5 Hz               | Acceleration       | 5 Hz/s | Deceleration       | 5 Hz/s |                    |     |
| 189  |                         | Wait                  | 30 s               |                    |        |                    |        |                    |     |
| 190  |                         | Stop temperature zone | 16                 |                    |        |                    |        |                    |     |
| 191  | <b>EtOH washing</b>     | Loop start            | 1                  |                    |        |                    |        |                    |     |
| 192  |                         | Frequency             | 8 Hz               | Acceleration       | 5 Hz/s | Deceleration       | 5 Hz/s |                    |     |
| STEP | <b>Description</b>      |                       | <b>Parameter 1</b> | <b>Parameter 2</b> |        | <b>Parameter 3</b> |        | <b>Parameter 4</b> |     |
| 193  |                         | Wait                  | 5 s                |                    |        |                    |        |                    |     |
| 194  |                         | Frequency             | 15 Hz              | Acceleration       | 5 Hz/s | Deceleration       | 5 Hz/s |                    |     |
| 195  |                         | Wait                  | 5 s                |                    |        |                    |        |                    |     |
| 196  |                         | Loop end              |                    | # of loops         | 2      |                    |        |                    |     |
| 197  | <b>Magnet movement</b>  | Frequency             | 5 Hz               | Acceleration       | 5 Hz/s | Deceleration       | 5 Hz/s |                    |     |
| 198  |                         | Wait                  | 20 s               |                    |        |                    |        |                    |     |
| 199  | <b>Waste4</b>           | Frequency             | 30 Hz              | Acceleration       | 5 Hz/s | Deceleration       | 5 Hz/s |                    |     |
| 200  |                         | Wait                  | 5 s                |                    |        |                    |        |                    |     |
| 201  |                         | Temperature zone      | 4128               | Temperature        | 90°C   | Time out           | 60 s   | Heating power      | 75% |
| 202  |                         | Wait                  | 50 s               |                    |        |                    |        |                    |     |
| 203  |                         | Frequency             | 3 Hz               | Acceleration       | 5 Hz/s | Deceleration       | 5 Hz/s |                    |     |
| 204  |                         | Wait                  | 10 s               |                    |        |                    |        |                    |     |
| 205  |                         | Temperature zone      | 4128               | Temperature        | 20°C   | Time out           | 60 s   | Heating power      | 75% |
| 206  |                         | Wait                  | 3 s                |                    |        |                    |        |                    |     |
| 207  |                         | Frequency             | 25 Hz              | Acceleration       | 5 Hz/s | Deceleration       | 5 Hz/s |                    |     |
| 208  |                         | Wait                  | 40 s               |                    |        |                    |        |                    |     |
| 209  |                         | Stop temperature zone | 4128               |                    |        |                    |        |                    |     |
| 210  |                         | Frequency             | 5 Hz               | Acceleration       | 5 Hz/s | Deceleration       | 5 Hz/s |                    |     |
| 211  | <b>EtOH evaporation</b> | Loop start            | 1                  |                    |        |                    |        |                    |     |
| 212  | <b>10 min</b>           | Temperature zone      | 64                 | Temperature        | 56°C   | Time out           | 60 s   | Heating power      | 75% |

*ESI: Nanobead handling on a centrifugal microfluidic LabDisk for automated extraction of cell-free circulating DNA with high recovery rates*

|             |                                          |                       |                    |                    |                    |                    |         |               |     |
|-------------|------------------------------------------|-----------------------|--------------------|--------------------|--------------------|--------------------|---------|---------------|-----|
| 213         |                                          | Wait                  | 60 s               |                    |                    |                    |         |               |     |
| 214         |                                          | Loop end              |                    | # of loops         | 10                 |                    |         |               |     |
| 215         |                                          | Stop temperature zone | 64                 |                    |                    |                    |         |               |     |
| 216         | <b>EB stickpack opening and transfer</b> | Loop start            | 1                  |                    |                    |                    |         |               |     |
| 217         |                                          | Frequency             | 40 Hz              | Acceleration       | 5 Hz/s             | Deceleration       | 5 Hz/s  |               |     |
| 218         |                                          | Wait                  | 30 s               |                    |                    |                    |         |               |     |
| 219         |                                          | Temperature zone      | 1792               | Temperature        | 100°C              | Time out           | 30 s    | Heating power | 75% |
| 220         |                                          | Wait                  | 60 s               |                    |                    |                    |         |               |     |
| <b>STEP</b> | <b>Description</b>                       |                       | <b>Parameter 1</b> | <b>Parameter 2</b> | <b>Parameter 3</b> | <b>Parameter 4</b> |         |               |     |
| 221         |                                          | Wait                  | 60 s               |                    |                    |                    |         |               |     |
| 222         |                                          | Frequency             | 5.5 Hz             | Acceleration       | 10 Hz/s            | Deceleration       | 10 Hz/s |               |     |
| 223         |                                          | Wait                  | 30 s               |                    |                    |                    |         |               |     |
| 224         |                                          | Frequency             | 15 Hz              | Acceleration       | 10 Hz/s            | Deceleration       | 10 Hz/s |               |     |
| 225         |                                          | Wait                  | 10 s               |                    |                    |                    |         |               |     |
| 226         |                                          | Temperature zone      | 1792               | Temperature        | 40°C               | Time out           | 30 s    | Heating power | 75% |
| 227         |                                          | Wait                  | 60 s               |                    |                    |                    |         |               |     |
| 228         |                                          | Loop end              |                    | # of loops         | 4                  |                    |         |               |     |
| 229         | <b>Elution</b>                           | Start timed loop      | 2                  |                    |                    |                    |         |               |     |
| 230         |                                          | Frequency             | 8 Hz               | Acceleration       | 5 Hz/s             | Deceleration       | 5 Hz/s  |               |     |
| 231         |                                          | Wait                  | 5 s                |                    |                    |                    |         |               |     |
| 232         |                                          | Frequency             | 20 Hz              | Acceleration       | 5 Hz/s             | Deceleration       | 5 Hz/s  |               |     |
| 233         |                                          | Wait                  | 5 s                |                    |                    |                    |         |               |     |
| 234         |                                          | End timed loop        | 2                  | Duration           | 4 min              |                    |         |               |     |
| 235         | <b>Magnet movement</b>                   | Wait                  | 20s                |                    |                    |                    |         |               |     |
| 236         | <b>Eluate transfer</b>                   | Frequency             | 15 Hz              | Acceleration       | 5 Hz/s             | Deceleration       | 5 Hz/s  |               |     |
| 237         |                                          | Temperature zone      | 1792               | Temperature        | 40°C               | Time out           | 30 s    | Heating power | 75% |
| 238         |                                          | Wait                  | 60 s               |                    |                    |                    |         |               |     |
| 239         |                                          | Loop start            | 1                  |                    |                    |                    |         |               |     |

*ESI: Nanobead handling on a centrifugal microfluidic LabDisk for automated extraction of cell-free circulating DNA with high recovery rates*

|            |                  |       |              |        |              |        |               |     |
|------------|------------------|-------|--------------|--------|--------------|--------|---------------|-----|
| <b>240</b> | Frequency        | 15 Hz | Acceleration | 5 Hz/s | Deceleration | 5 Hz/s |               |     |
| <b>241</b> | Temperature zone | 1792  | Temperature  | 100°C  | Time out     | 30 s   | Heating power | 75% |
| <b>242</b> | Wait             | 60 s  |              |        |              |        |               |     |
| <b>243</b> | Temperature zone | 1792  | Temperature  | 20°C   | Time out     | 30 s   | Heating power | 75% |
| <b>244</b> | Frequency        | 8 Hz  | Acceleration | 5 Hz/s | Deceleration | 5 Hz/s |               |     |
| <b>245</b> | Wait             | 10 s  |              |        |              |        |               |     |
| <b>246</b> | Frequency        | 6 Hz  | Acceleration | 5 Hz/s | Deceleration | 5 Hz/s |               |     |
| <b>247</b> | Wait             | 30 s  |              |        |              |        |               |     |
| <b>248</b> | Loop end         |       | # of loops   | 2      |              |        |               |     |



*ESI: Nanobead handling on a centrifugal microfluidic LabDisk for automated extraction of cell-free circulating DNA with high recovery rates*
